# Supplementary material for: High-efficiency hydrogen evolution reaction catalyzed by iron phosphide nanocrystals
Source: Royal Society of Chemistry journal article supplement (doi:10.1039/c6ra24186g), 2016-01-01
Supplement: c6ra24186g1.pdf [file c6ra24186g1.pdf]

## Supporting information

### High-efficiency hydrogen evolution catalyzed by iron phosphide nanocrystals

Zhichao Gao,<sup>a</sup> Qian Gao,<sup>a</sup> Zhipeng Liu,<sup>a</sup> Cong Zhang,<sup>a</sup> Xiaoting Zhang,<sup>a</sup> Xin Liu,<sup>a</sup> Runwei  
Wang<sup>b</sup> and Nan Li<sup>\*a</sup>

<sup>a</sup>College of Material Science and Engineering, Key Laboratory of Automobile  
Materials of Ministry of Education, Jilin University, 2699 Qianjin Street,  
Changchun, 130012, P. R. China.

<sup>b</sup>State Key Laboratory of Inorganic Synthesis and Preparative Chemistry, College of  
Chemistry, Jilin University, Changchun, 130012, P. R. China.

\*Corresponding author. Phone: +86 43185094856. Fax: +86 43185094856.

E-mail address: [lin@jlu.edu.cn](mailto:lin@jlu.edu.cn)

### **Synthesis of CoP/C NCs**

1.455 g of cobalt nitrate hexahydrate ( $\text{Co}(\text{NO}_3)_3 \cdot 6\text{H}_2\text{O}$ ) was ground with 0.787 g of ammonium bicarbonate ( $\text{NH}_4\text{HCO}_3$ ) in a mortar. The reagents were ground until the bubbling ceased (~5-10 min) and then 0.24 g carbon black (Carbot Vulcan XC72R) (with Co/C mole ratio of 1/4) was added to the slurry. The following processes were the same as that of  $\text{Fe}_2\text{O}_3/\text{C}$ .

### **Synthesis of Ni<sub>2</sub>P/C NCs**

1.454 g of nickel nitrate hexhydrate ( $\text{Ni}(\text{NO}_3)_3 \cdot 6\text{H}_2\text{O}$ ) was ground with 0.787 g ammonium bicarbonate ( $\text{NH}_4\text{HCO}_3$ ) in a mortar. After ~10 min, 0.24 g of carbon black (Carbot Vulcan XC72R) (with Ni/C mole ratio of 1/4) was added to the slurry. The following processes were the same as that of  $\text{Fe}_2\text{O}_3/\text{C}$  except that both the calcination and

the phosphidation step were prolonged from 1h to 2h.

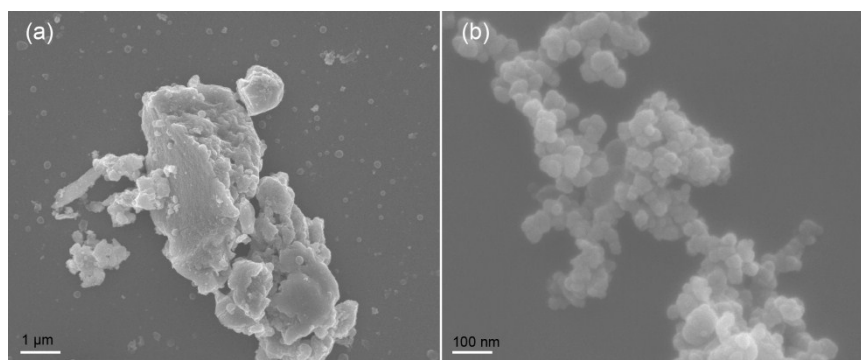

Fig. S1 SEM image of pure FeP (a) and bare carbon black (b).

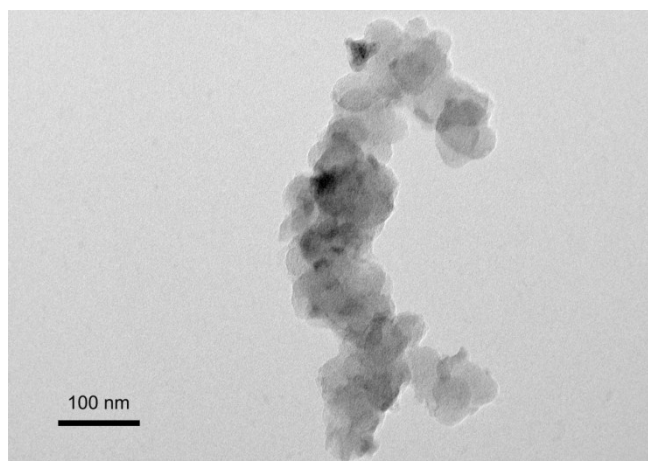

Fig. S2 Low-resolution TEM image of FeP/C NCs.

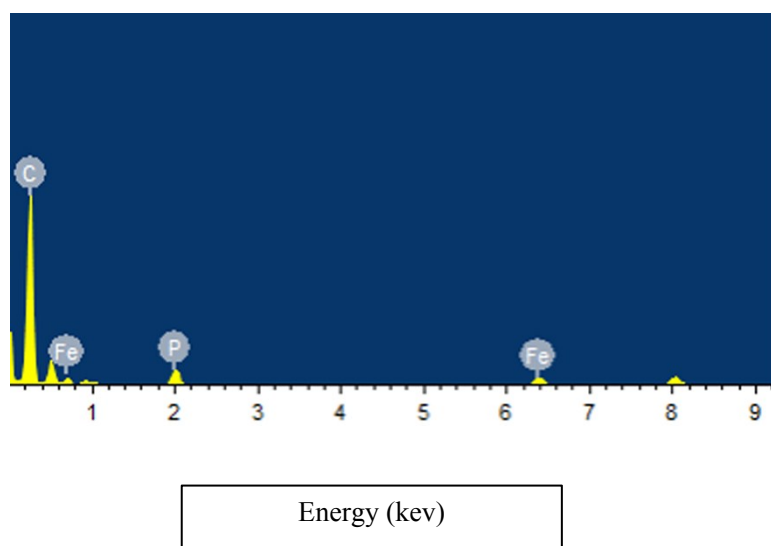

Fig. S3 EDS spectrum of FeP/C NCs.

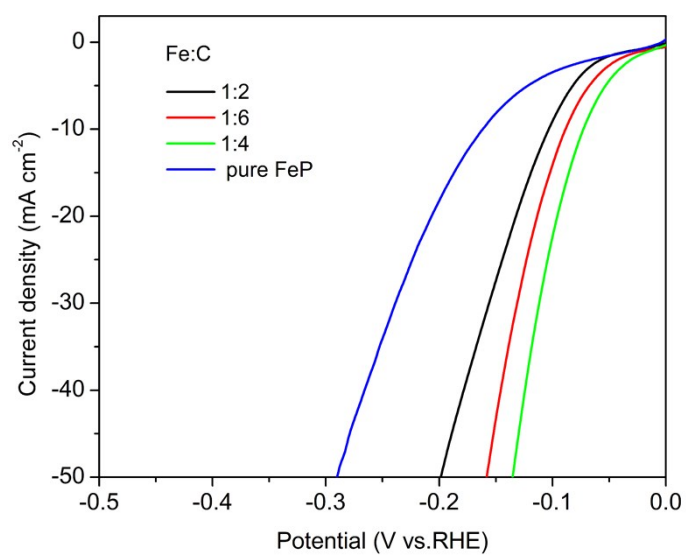

Fig. S4 Polarization curves of FeP/C NCs catalysts synthesized with various Fe/C mole ratio.

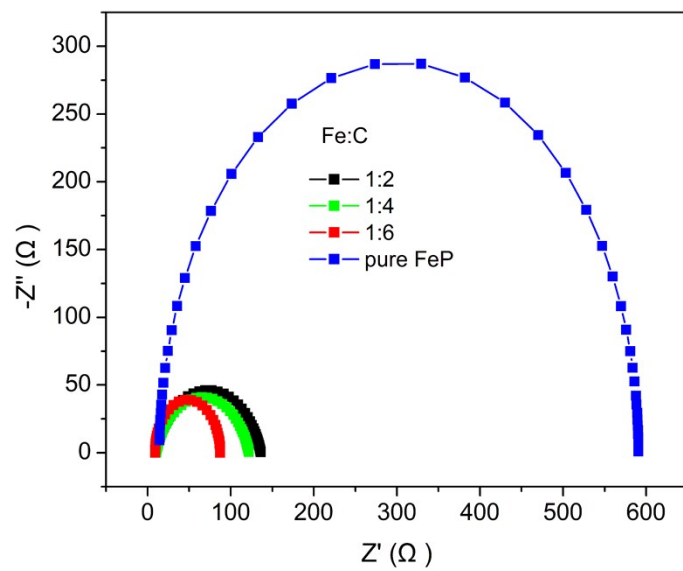

Fig. S5 Nyquist plots of FeP/C NCs catalysts synthesized with various Fe/C mole ratio.

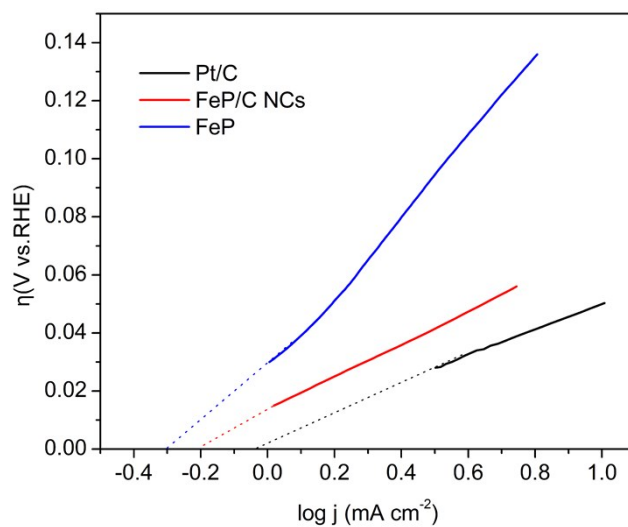

Fig. S6 Calculation of exchange current density for FeP/C NCs, pure FeP and Pt/C.

Exchange current density ( $j_0$ ) was calculated using extrapolation methods. When the value of overpotential ( $\eta$ ) is 0, the  $\log j$  values of FeP/C, FeP and Pt/C are -0.2, -0.3 and -0.02 respectively. Based on Tafel equations,  $j_0$  was calculated to be 0.631, 0.501 and 0.955 mA cm<sup>-2</sup> for FeP/C, FeP and Pt/C respectively.

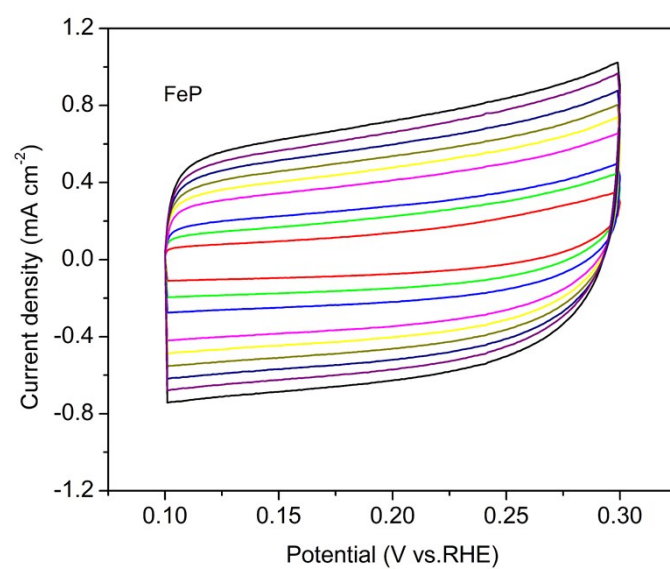

Fig. S7 Cyclic voltammograms (CV) recorded for pure FeP at various scan rates.

**Table S1** Comparison of the HER performances for recently reported transition metal phosphide-based catalysts (in 0.5M H<sub>2</sub>SO<sub>4</sub> electrolyte).

| Catalyst                                 | Current density<br>( <i>j</i> , mA/cm <sup>2</sup> ) | $\eta$ at the<br>corresponding<br><i>j</i> (mV) | Exchange<br>Current density<br>(mA/cm <sup>2</sup> ) | Tafel slope<br>(mV/dec) | Ref.      |
|------------------------------------------|------------------------------------------------------|-------------------------------------------------|------------------------------------------------------|-------------------------|-----------|
| FeP/C NCs                                | 10                                                   | 70                                              | 0.631                                                | 56                      | This work |
| Pure FeP                                 | 10                                                   | 157                                             | 0.501                                                | 138                     | This work |
| CoP/C NCs                                | 10                                                   | 117                                             | --                                                   | 58                      | This work |
| Ni <sub>2</sub> P/C NCs                  | 10                                                   | 253                                             | --                                                   | 92                      | This work |
| FeP-GS                                   | 10                                                   | 123                                             | 0.12                                                 | 50                      | [33]      |
| FeP array                                | 10                                                   | 96                                              | 0.17                                                 | 39                      | [35]      |
| FeP <sub>2</sub> array                   |                                                      | 61                                              | 0.55                                                 | 31                      |           |
| FeP/CC                                   | 10                                                   | 39                                              | 0.59                                                 | 32                      | [36]      |
| FeP nanosheets                           | 10                                                   | ~240                                            | --                                                   | 67                      | [37]      |
| FeP NRs                                  | 10                                                   | 120                                             | 0.062                                                | 55                      | [38]      |
| FeP nanrod /Ti                           | 10                                                   | 85                                              | --                                                   | 60                      | [39]      |
| FeP NPs                                  | 10                                                   | 112                                             | 0.22                                                 | 58                      | [40]      |
| FeP/NCNT                                 | 10                                                   | 113                                             | 0.15                                                 | 59                      | [41]      |
| FeP NA/Ti                                | 10                                                   | 55                                              | 0.42                                                 | 38                      | [44]      |
| Fe <sub>0.5</sub> Co <sub>0.5</sub> P/CC | 10                                                   | 37                                              | --                                                   | 30                      | [45]      |
| CoP/CNT                                  | 10                                                   | 122                                             | 0.13                                                 | 54                      | [16]      |
| CoP NWs                                  |                                                      | 110                                             | 0.15                                                 | 54                      |           |
| CoP NSs                                  | 10                                                   | 164                                             | 0.032                                                | 61                      |           |
| CoP NPs                                  |                                                      | 221                                             | 0.054                                                | 87                      | [17]      |

|                                   |    |           |                    |      |      |
|-----------------------------------|----|-----------|--------------------|------|------|
| CoP nanotube                      | 10 | 129       | --                 | 60   | [18] |
| u-CoP/Ti                          | 10 | 45        | --                 | 49.3 | [19] |
| CoP/Ti                            | 10 | 90        | --                 | 43   | [20] |
| CoP/CC                            | 10 | 67        | 0.288              | 51   | [21] |
| CoP-RGO                           | 10 | 156.87    | 0.057              | 70.2 | [22] |
| Ni <sub>2</sub> P/Ti              | 20 | 138       | --                 | 60   | [23] |
| Cu <sub>3</sub> P NW/CF           | 10 | 143       | 0.18               | 67   | [24] |
| Amorphous<br>MoP<br>nanoparticles | 10 | 90        | 0.12               | 45   | [29] |
| WP NAs/CC                         | 10 | 130       | 0.29               | 69   | [30] |
| FeS <sub>2</sub> film             | 4  | 190 ~ 270 | 5.2e <sup>-4</sup> | 62.5 | [9]  |
| FeSe <sub>2</sub> film            | 4  | 190 ~ 270 | 3.0e <sup>-4</sup> | 65.3 | [9]  |

---
